# Supplementary material
Source: HighWire-hosted journal article supplement (https://tech.snmjournals.org/highwire/filestream/9943/field_highwire_adjunct_files/0/261893_Supplemental_Data.pdf)

For PYP- participants, global longitudinal strain is significantly strongly correlated with apical, mid, and basal regions with Pearson correlation coefficient  $>0.6$  and p value  $<.001$ . The apical region is significantly strongly associated with mid region, with correlation of 0.7 ( $p<.001$ ) but is not significantly associated with the basal with small correlation coefficient as 0.28 and p value as 0.08 (Table s1 and S2). For PYP +, global longitudinal strain is significantly strongly correlated with apical and mid regions but not with the basal region with strong Pearson correlation coefficient  $>0.8$  and p value  $<.001$  for apex and mid, while correlation coefficient as 0.22 ( $p=0.32$ ) for basal. Apical region is significantly associated with mid with medium Pearson correlation coefficient as 0.55 ( $p=0.009$ ) but not basal with p value as 0.44. Mid is not significantly associated with basal with p-value of 0.92. basal is not statistically associated with global, apex, and mid with p value all  $>0.05$  (Tables S3 and S4).

**Supplemental Table 1 Pearson correlation coefficient for PYP- groups (Global, apex, mid, basal).**

| Pearson Correlation Coefficients, N = 41<br>Prob >  r  under H0: Rho=0 |                |                |                |                |
|------------------------------------------------------------------------|----------------|----------------|----------------|----------------|
|                                                                        | Global         | Apex           | Mid            | Basal          |
| Global                                                                 | 1.00000        | 0.87<br><.0001 | 0.89<br><.0001 | 0.64<br><.0001 |
| Apex                                                                   | 0.87<br><.0001 | 1.00           | 0.71<br><.0001 | 0.28<br>0.08   |
| Mid                                                                    | 0.89<br><.0001 | 0.71<br><.0001 | 1.00           | 0.46<br>0.003  |
| Basal                                                                  | 0.64<br><.0001 | 0.28<br>0.08   | 0.46<br>0.003  | 1.00           |

Supplemental Table 2 - Matrix scatter plot (PYP-).

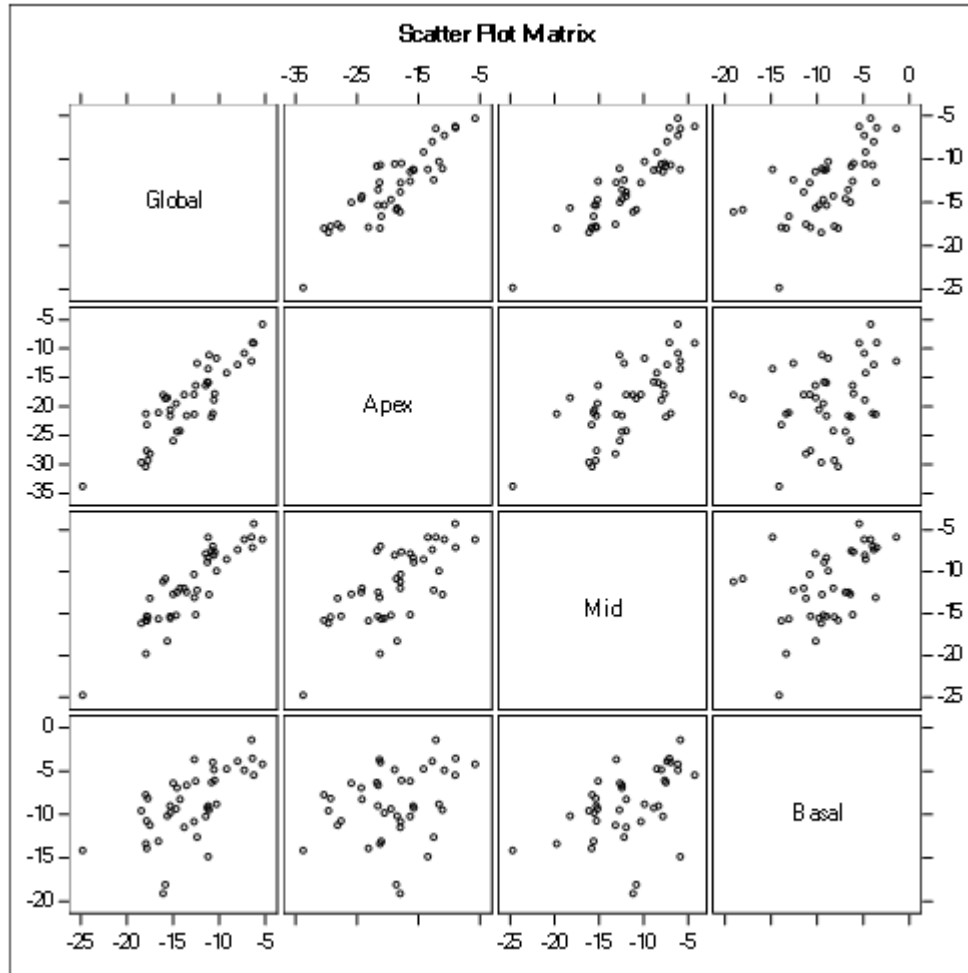

**Supplemental Table 3 Pearson correlation coefficient for PYP+ groups (Global, apex, mid, basal).**

| <b>Pearson Correlation Coefficients, N = 22</b><br><b>Prob &gt;  r  under H0: Rho=0</b> |                |                |                |               |
|-----------------------------------------------------------------------------------------|----------------|----------------|----------------|---------------|
|                                                                                         | <b>Global</b>  | <b>Apex</b>    | <b>Mid</b>     | <b>Basal</b>  |
| <b>Global</b>                                                                           | 1.00           | 0.81<br><.0001 | 0.84<br><.0001 | 0.22<br>0.32  |
| <b>Apex</b>                                                                             | 0.81<br><.0001 | 1.00           | 0.55<br>0.009  | -0.17<br>0.44 |
| <b>Mid</b>                                                                              | 0.84<br><.0001 | 0.55<br>0.009  | 1.00           | -0.02<br>0.92 |
| <b>Basal</b>                                                                            | 0.22<br>0.32   | -0.17<br>0.44  | -0.02<br>0.92  | 1.00          |

Supplemental Table 4 matrix scatter plot (PYP+).

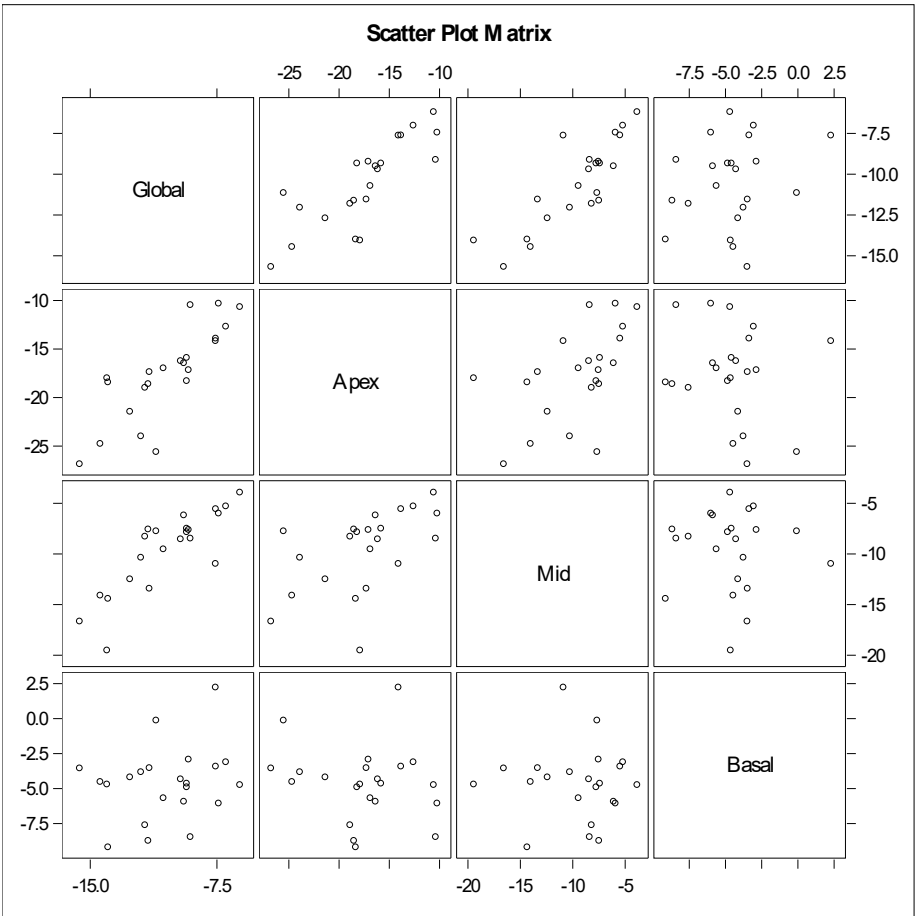

Supplement: 261893_Supplemental_Data.pdf [file 261893_Supplemental_Data.pdf]
